# Supplementary material for: Applications of a high performance platinum nanocatalyst for the oxidation of alcohols in water
Source: Royal Society of Chemistry journal article supplement (doi:10.1039/b815948c), 2009-01-01
Supplement: b815948c.pdf [file b815948c.pdf]

# Supplementary Material

**E-factor calculations for the synthesis of 1 and 2 and the reported three other catalysts: Pt@hc; ARP-Pt; Pt-GLY.**

---

**Calculation of E-factor values for various Pt nanocatalyst systems:**

$$\text{E-factor} = \text{Kg (waste)}/\text{Kg (product)}$$

**1. Chem. Commun., 2008, 3181 (Pt@hc)**

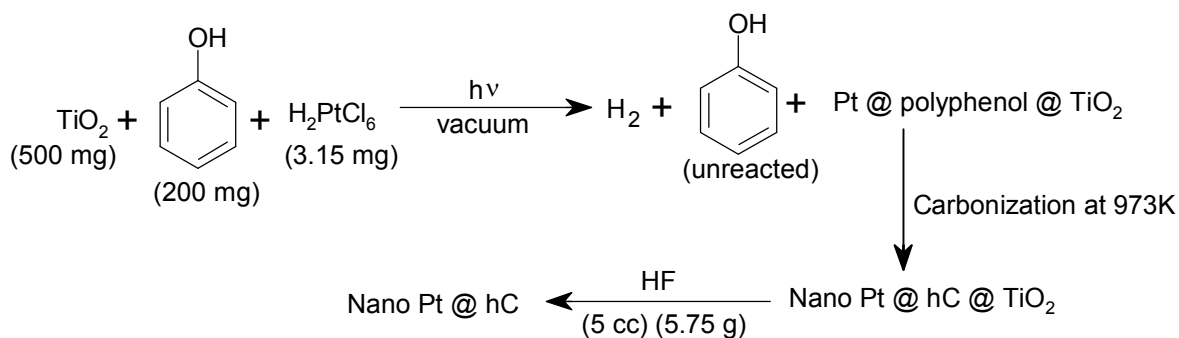

Total amount of reactants: 500 mg + 200 mg + 3.15 mg + 5.75 g = 6.48 g

Amount of final product: 203 mg., assuming that the same amount of phenol and platinum salt used in the beginning are retained in the final catalyst.

Amount of waste: (6.48 – 0.203) g = 6.277 g

E-Factor = Amount of waste/Amount of product = 6.277/0.203 = 30.92

2. Chem. Commun., 2007, 4375 (Pt-GLY)

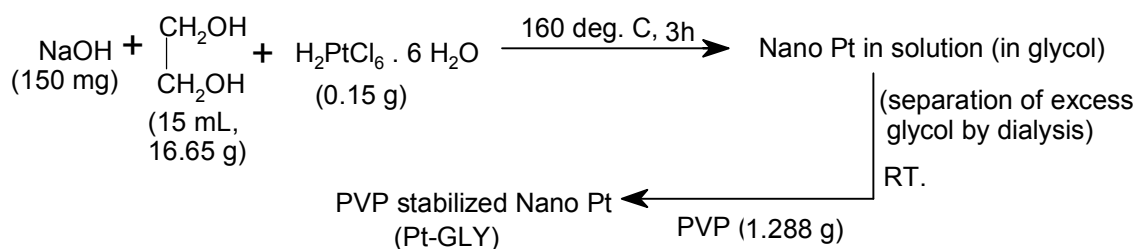

Total amount of reactants:  $0.150 \text{ g} + 16.65 \text{ g} + 0.15 \text{ g} + 1.288 \text{ g} = 18.178 \text{ g}$

Amount of final product:  $1.328 \text{ g}$ , assuming that the same amount of PVP and platinum salt used in the beginning retain in the final catalyst.

Amount of waste:  $(18.178 - 1.328) \text{ g} = 16.85 \text{ g}$

E-Factor = Amount of waste/Amount of product =  $6.277/0.203 = 12.68$

3. Angew. Chem. Int. Ed., 2007, 46, 704 (ARP-Pt)

E-Factor for the synthesis of Zeises salt,  $K[PtCl_3(C_2H_4)] \cdot H_2O$ :

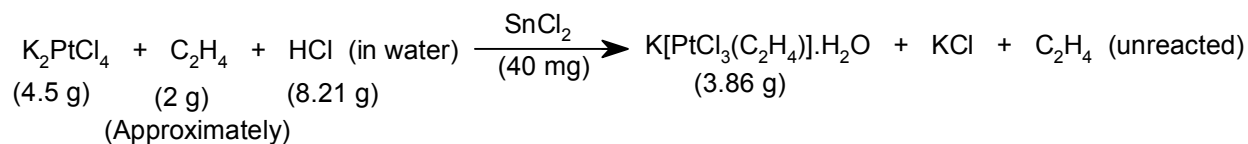

Total amount of reactants:  $4.5 \text{ g} + 2 \text{ g} + 8.21 \text{ g} = 14.71 \text{ g}$  [solvent (water) and catalyst ( $SnCl_2$ ) have been excluded from this calculation].

Amount of final product: 3.86 g

Amount of waste:  $(14.71 - 3.86) \text{ g} = 10.85 \text{ g}$

E-Factor = Amount of waste/Amount of product =  $10.85/3.86 = 2.81$

E-Factor for the synthesis of final catalyst:

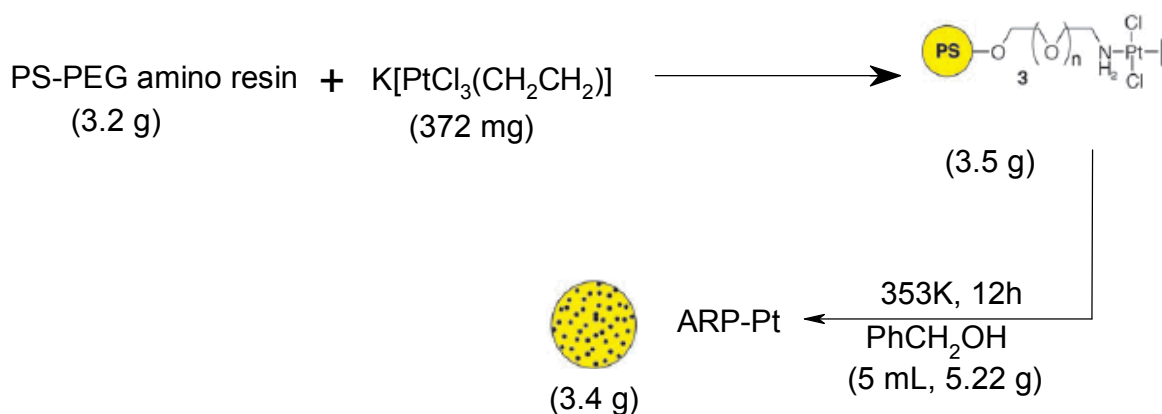

Total amount of reactants:  $3.2 \text{ g} + 0.372 \text{ g} + 5.22 \text{ g} = 8.792$

Amount of final product: 3.4 g

Amount of waste:  $(8.792 - 3.4) \text{ g} = 5.392 \text{ g}$

E-Factor = Amount of waste/Amount of product =  $5.392/3.4 = 1.58$

Total E factor =  $2.81 + 1.58 = 4.39$

#### 4. Our systems:

##### For catalyst 1

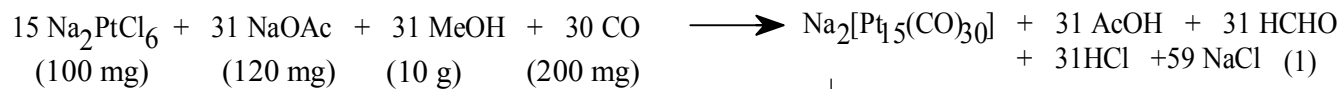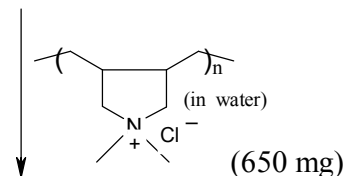

$[\text{Pt}_{15}(\text{CO})_{30}] @ \text{Poly}(\text{DADMAC})$   
**(catalyst 1)**  
 (800 mg)

Total amount of reactants: 100 mg + 120 mg + 200 mg + 650 mg + 10 gm = 11070 mg.

Amount of final product: 800 mg

Amount of waste: (11070 – 800) mg. =10 270 mg.

E-Factor = Amount of waste/Amount of product = 10270/800 = 12.8

##### For catalyst 2

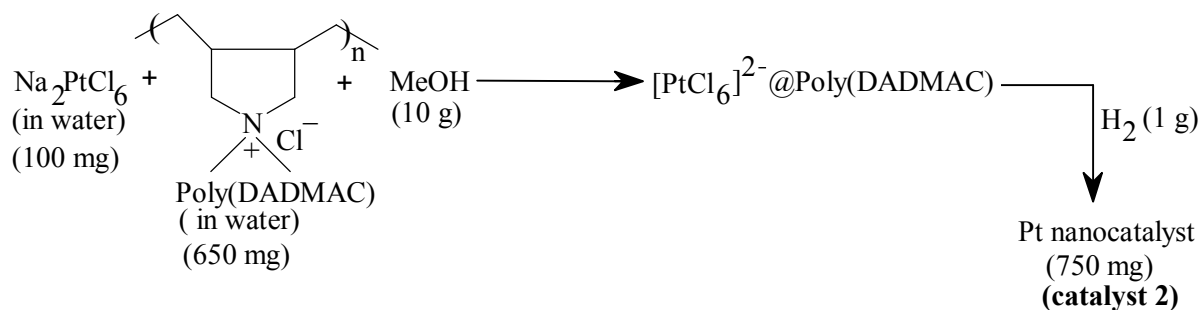

Total amount of reactants: 100 mg + 650 mg + 10 g + 1 g = 11750 mg.

Amount of final product: 750 mg

Amount of waste: (11750 – 750) mg. =11000 mg.

E-Factor = Amount of waste/Amount of product = 11000/750 = 14.66
